# Supplementary material for: Identifying Nutrient Patterns in South African Foods to Support National Nutrition Guidelines and Policies
Source: MDPI journal article supplement (doi:10.3390/nu13093194), 2021-09-14
Supplement: s1 [file s1]

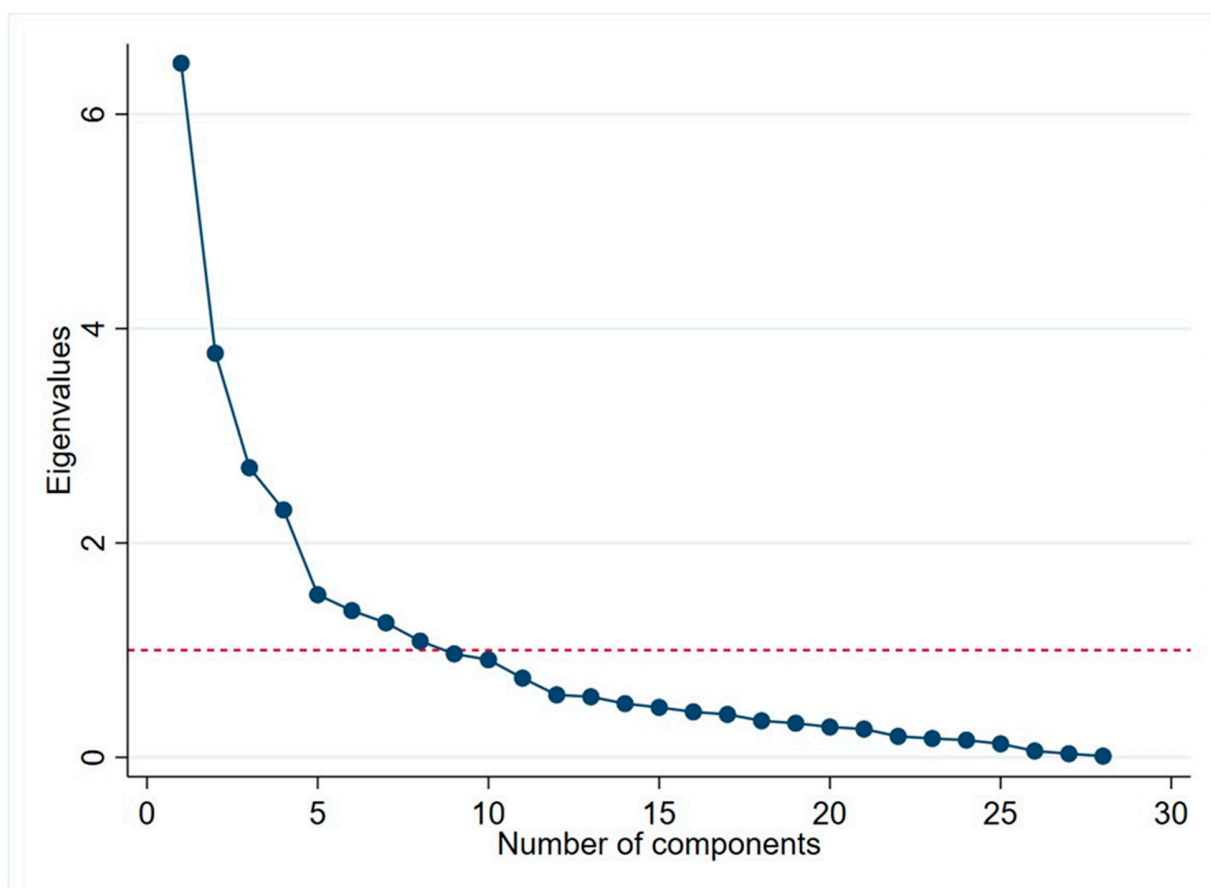

**Figure S1.** Screeplot for the principal component analysis of nutrients.

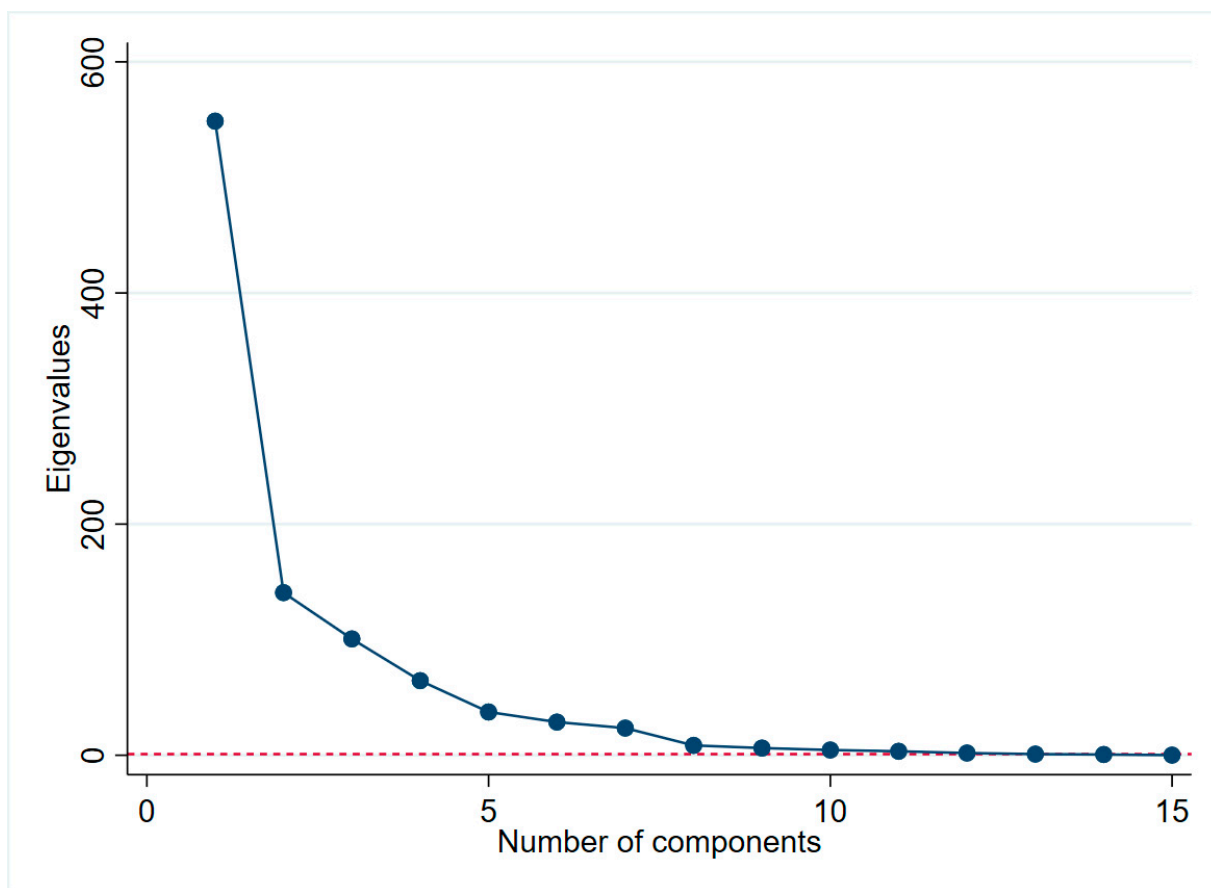

**Figure S2.** Screeplot for the principal component analysis of food items.
